# Supplementary material for: Soft landing of polyatomic anions onto three-dimensional semiconductive and conductive substrates
Source: Royal Society of Chemistry journal article supplement (doi:10.1039/d2na00632d), 2023-01-01
Supplement: d2na00632d1.pdf [file d2na00632d1.pdf]

## Supplementary Information

### Soft landing of polyatomic anions onto three-dimensional semiconductive and conductive substrates

Habib Gholipour-Ranjbar,<sup>a</sup> Hang Hu,<sup>a</sup> Pei Su,<sup>a</sup> Hugo Yuset Samayoa Oviedo <sup>a</sup>, Christopher Gilpin,<sup>c</sup> Haomin Wang,<sup>b</sup> Yingying Zhang,<sup>b</sup> and Julia Laskin<sup>a\*</sup>

<sup>a</sup> Department of Chemistry, Purdue University, West Lafayette, IN, 47906 USA

<sup>b</sup>Key Laboratory of Organic Optoelectronics and Molecular Engineering of the Ministry of Education, Department of Chemistry, Tsinghua University, Beijing 100084, China

<sup>c</sup>Life Science Microscopy Facility, Purdue University, West Lafayette, IN, 47907 USA

Correspondence to: [jlaskin@purdue.edu](mailto:jlaskin@purdue.edu)

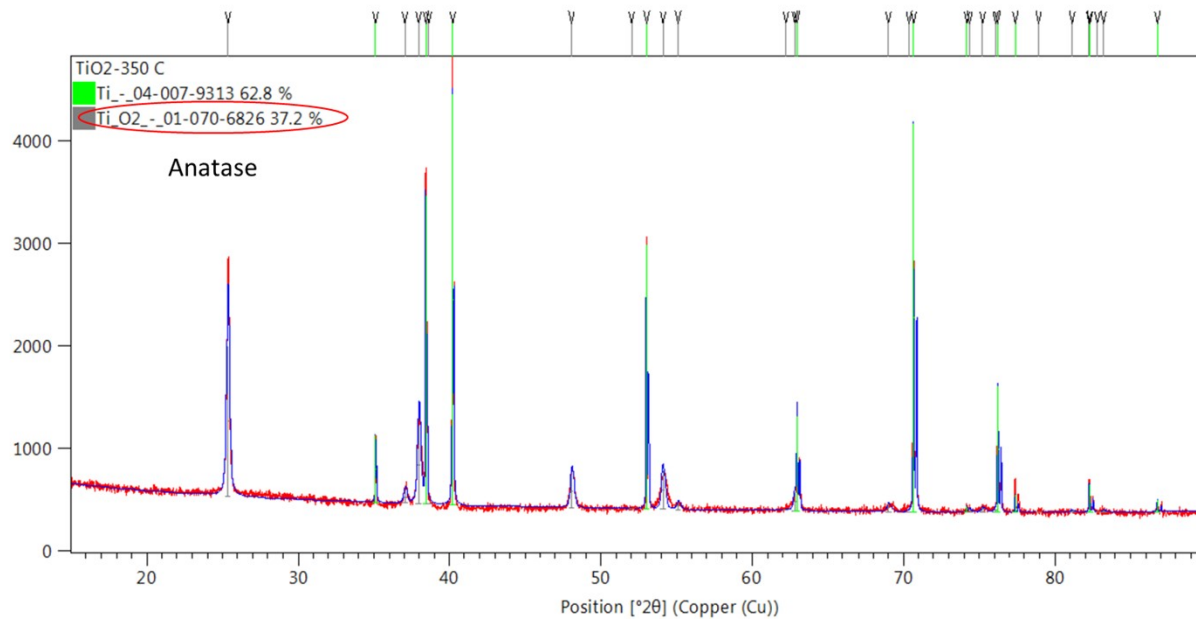

**Figure S1.** XRD spectrum of the 10  $\mu\text{m}$ -long TiO<sub>2</sub> NT/Ti sample.

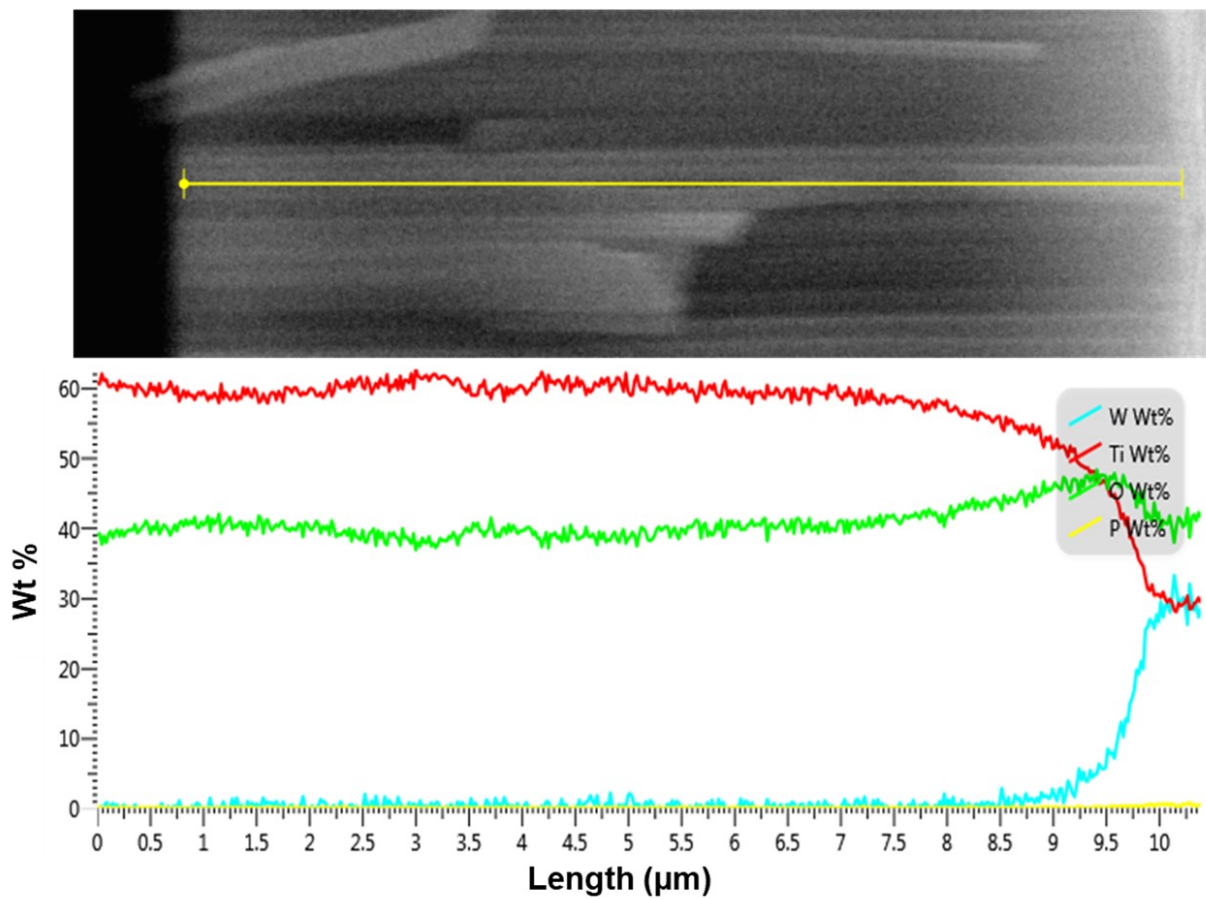

**Figure S2.** EDX line scans across the length of WPOM/TiO<sub>2</sub> with the coverage of 6.28<sup>±</sup>14 ions (960 ng). The results are expressed in terms of weight percentages (Wt%) of the elements

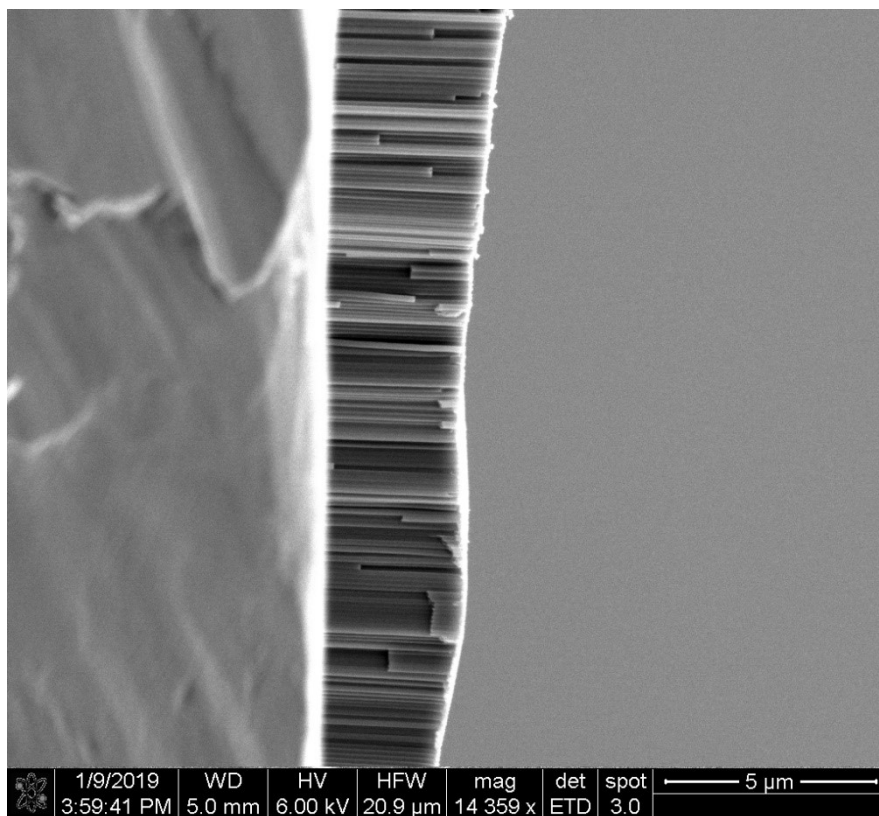

**Figure S3.** SEM image of 6 μm WPOM/TiO<sub>2</sub> NTs attached to the Ti substrate.

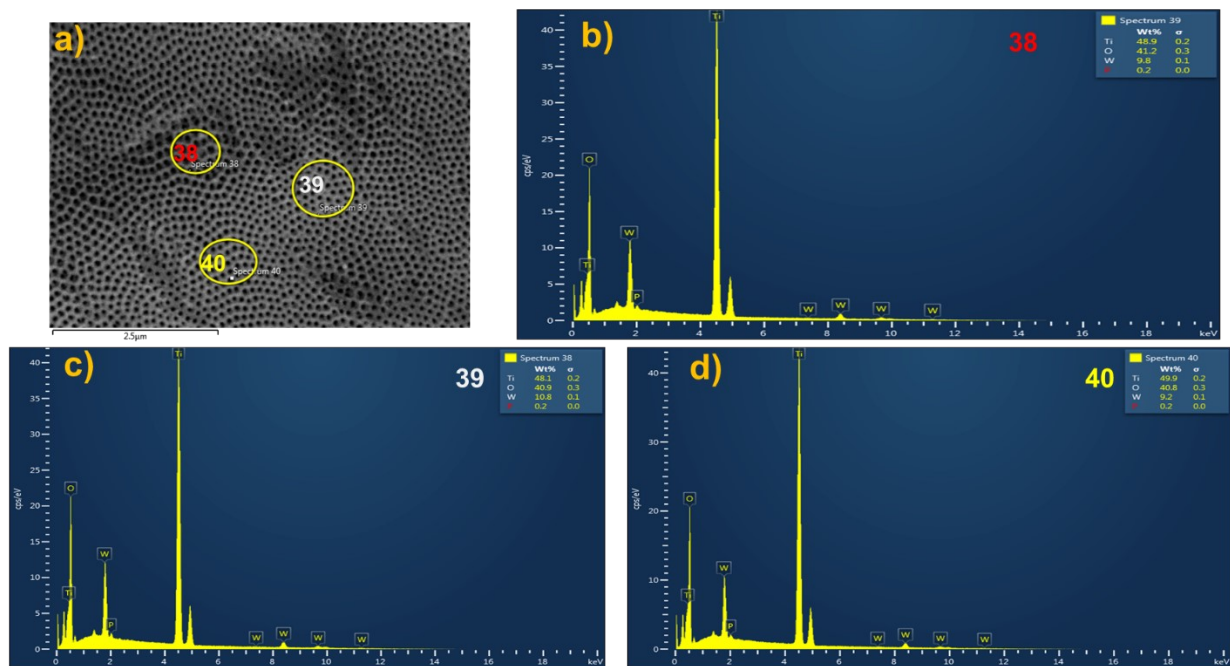

**Figure S4.** (a) SEM image of the TiO<sub>2</sub>/WPOM sample and (a,b,c) is the EDX spectra of the sample at point 38, 39, and 40.

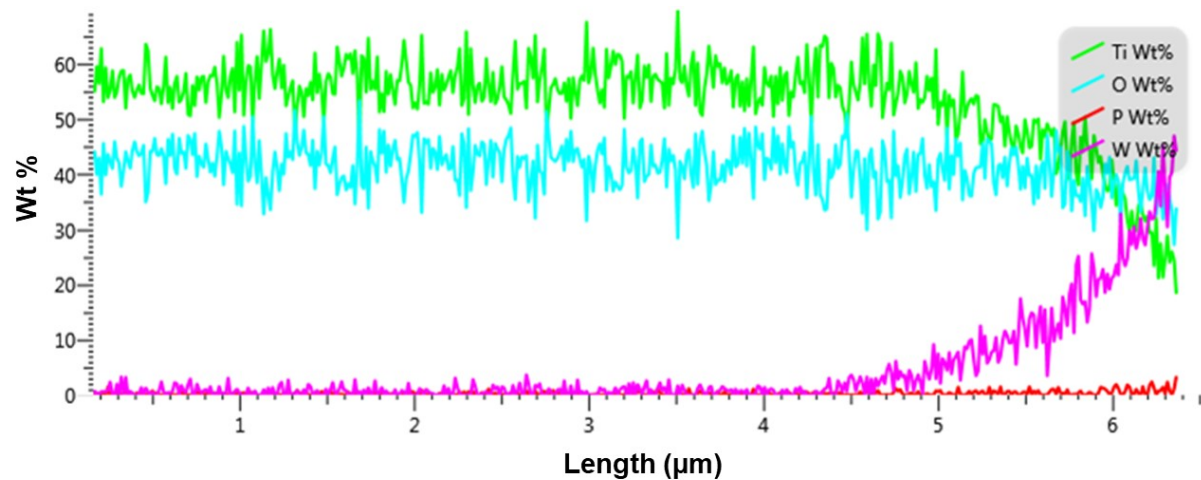

**Figure S5.** EDX line scans across the short TiO<sub>2</sub> NTs (6 μm)/ with the coverage of 3.0 $\times$  10<sup>14</sup> ions (480 ng). The results are expressed in terms of weight percentages (Wt%) of the elements.

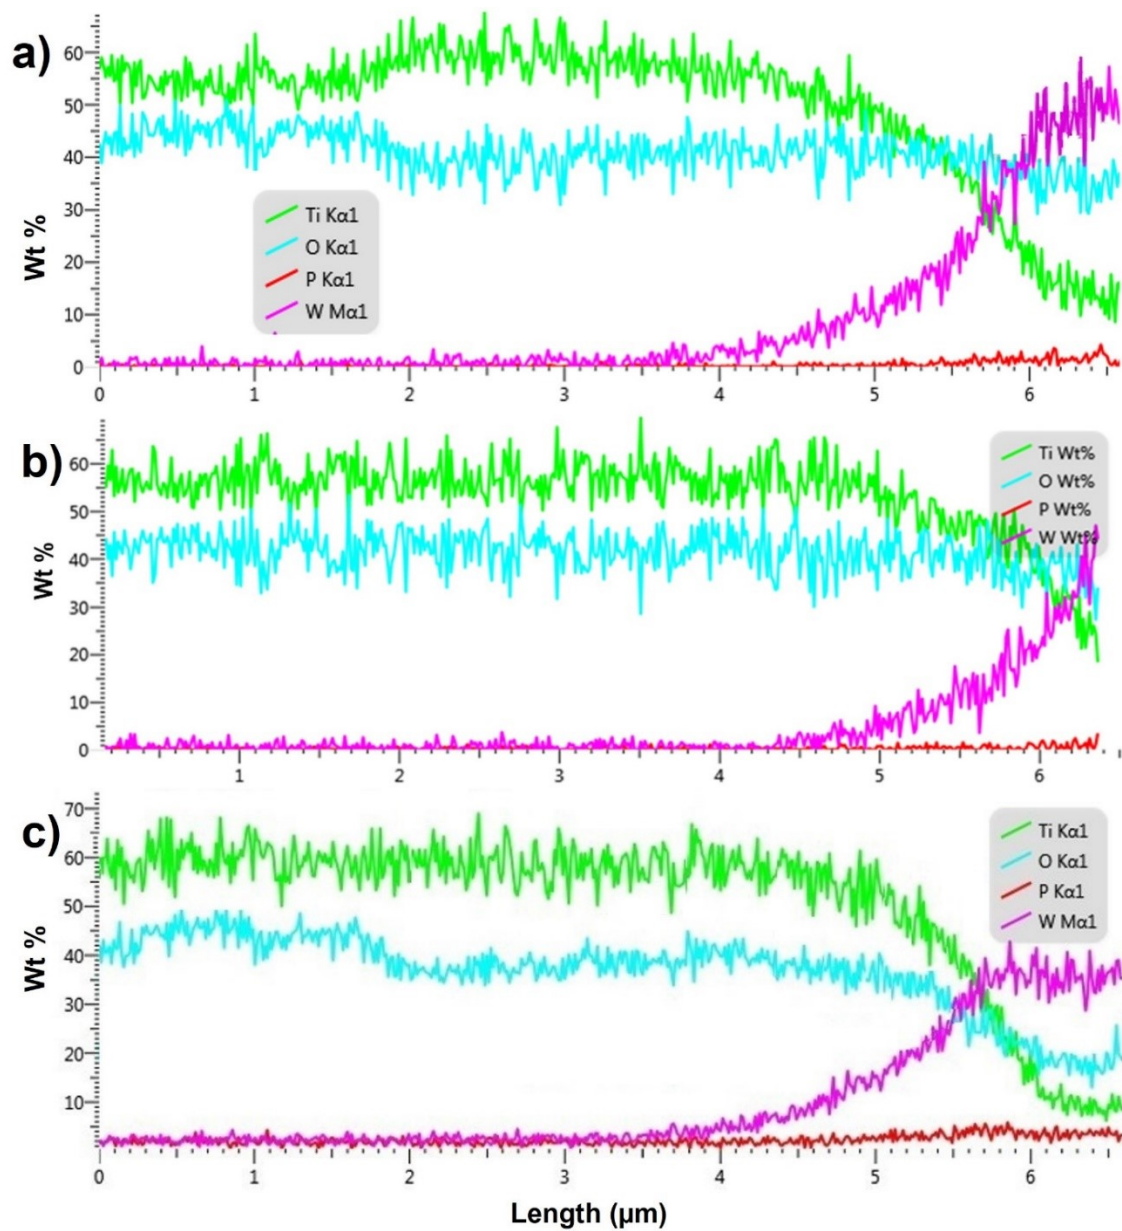

**Figure S6.** EDX line scan profile of 6 μm TiO<sub>2</sub>/WPOM at different region of the TiO<sub>2</sub> cross section.

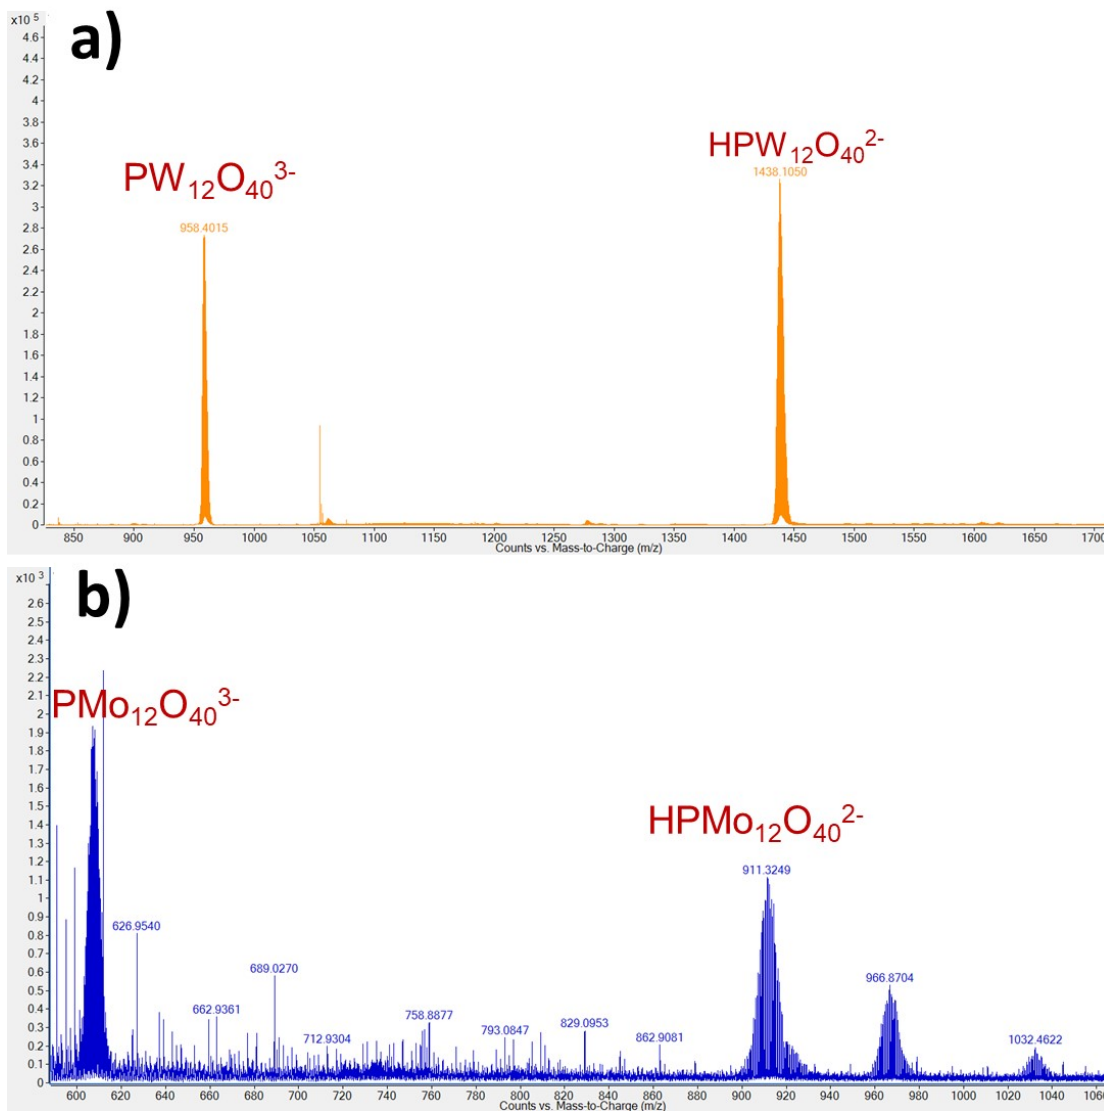

**Figure S7.** (a) mass spectrum of the  $\text{TiO}_2/\text{WPOM}$  sample with the coverage of  $1.0 \times 10^{14}$  ions and (b) mas spectrum of the  $\text{VACNT}/\text{MoPOM}$  with the coverage of  $1.0 \times 10^{14}$ .



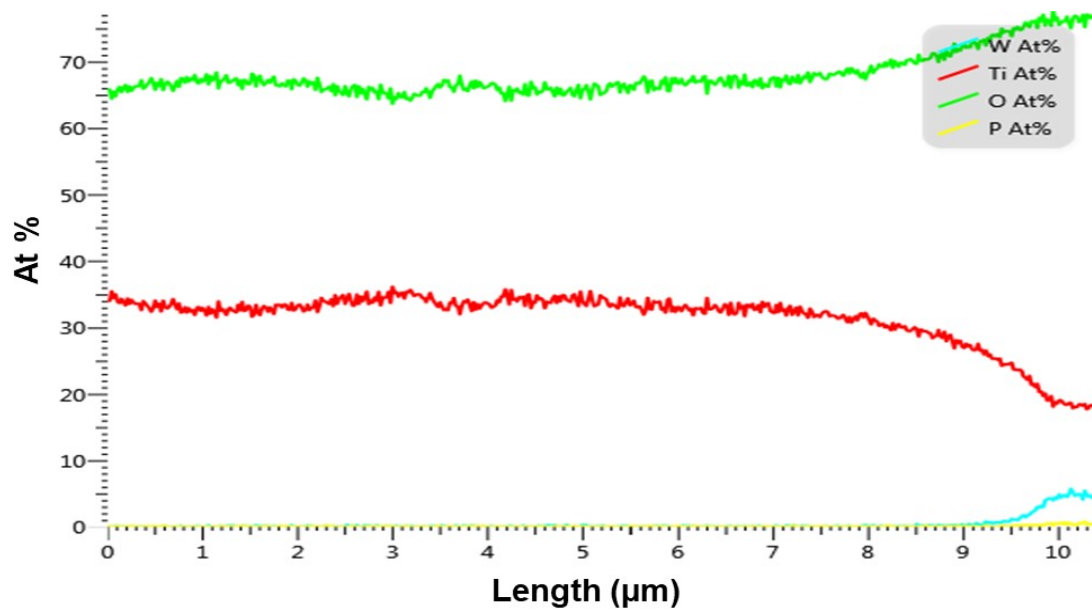

**Figure S8.** EDX line scans across the length of pristine WPOM/TiO<sub>2</sub> with the coverage of  $6.2 \times 10^{14}$  ions (980 ng). The results are expressed in terms of atomic percentages (At%) of the elements.

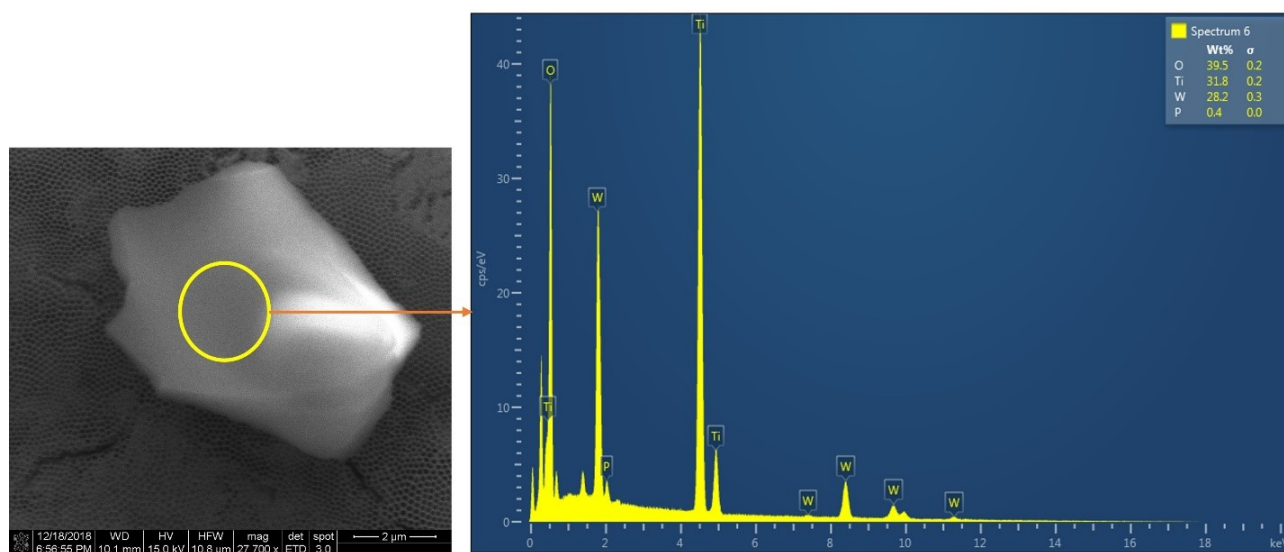

**Figure S9.** SEM image of the WPOM/TiO<sub>2</sub> with the coverage of  $6.2 \times 10^{14}$  ions (960 ng) and the EDX spectrum of the aggregated anions on the surface.

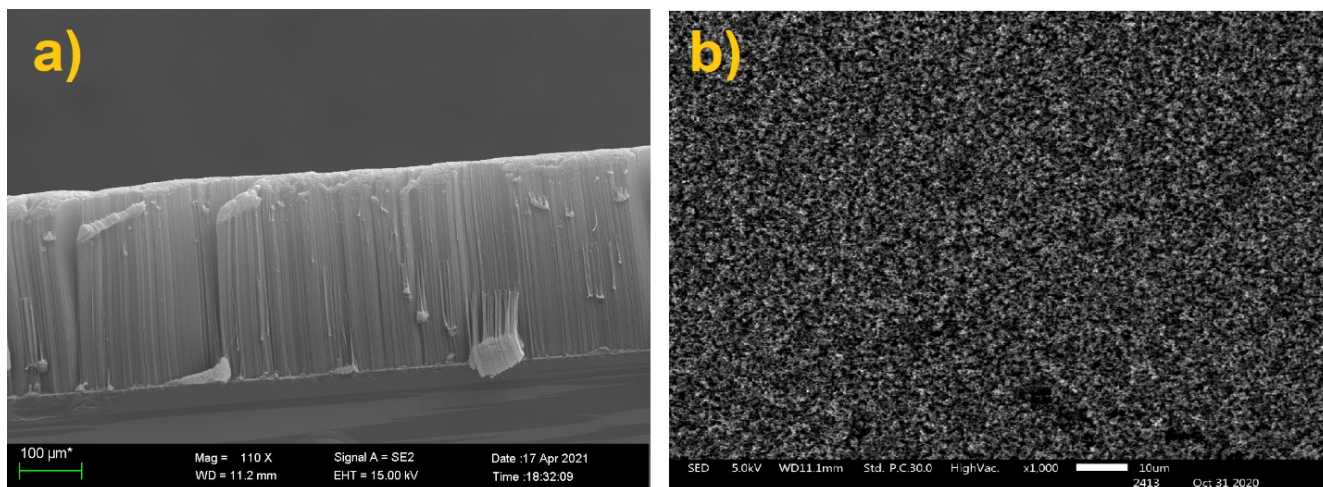

**Figure S10.** (a) side view and (b) top view of VACNT before soft landing anions.

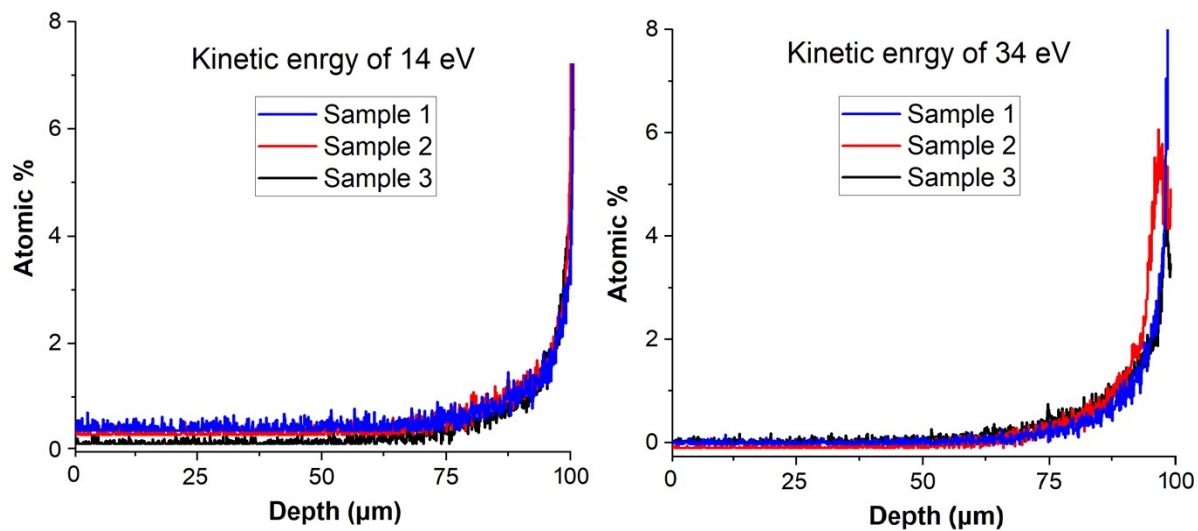

**Figure S11.** EDX line scan profile of VACNT/MoPOM samples with the coverage of  $1.0 \times 10^{14}$  ions and KE of (a) 14 eV (b) 34 eV

### Calculation of ion coverage

We measure the image current using picoamp meter (I). Based on the measured image current we calculate number of the soft-landed ions on a surface.

The image current measured in the soft landing experiment was ~6 nA/S:

Measured Ion current (I)  $\times$  time (S)  $\times$  charge generated by one mol of triply charged anion (POM)  $\times$  # of anions in 1mol = **coverage of anions**

$$6.0 \times 10^{-9} \text{ C/S} \times (400 \text{ min} \times 60 \text{ S}) \times (96352 \text{ C}) \times 3 \times \frac{6.022 \times 10^{23}}{1 \text{ mol ion}} = 3.0 \times 10^{14} \text{ \# of anions}$$

$$Q = n \times e = 6.022 \times 10^{23} \times 1.6 \times 10^{-19} = 96352 \text{ C}$$

Q: charge of 1 mol electron

e: charge on 1 electron =  $1.6 \times 10^{-19}$

### Calculation of number of monolayers (ML) on surfaces

The average diameter of the ion beam was approximately 5 mm.  $r_1 = 2.50 \text{ mm}$

Deposition area:  $A = \pi r_1^2$

We assume that the radius of the WPOM anions is 0.9 nm.  $R_2 = 0.9 \text{ nm}$

$$\text{Ratio of the area covered by each ion: } \frac{\pi R_2^2}{\pi r_1^2} = \left( \frac{0.9 \times 10^{-7}}{2.50} \right)^2 = 12.96 \times 10^{-14}$$

This means that one ion covers 12.96  $\times 10^{-12}$  % of the monolayer of the total area.

Therefore 100% of a monolayer will require  $1.296 \times 10^{13} \approx 1.3 \times 10^{13}$  ions.

In the samples with the coverage of  $3.0 \times 10^{14}$  ions, there will be 23 monolayers.

**Estimated ion flux per unit time per area corresponding to a single TiO<sub>2</sub> NT (100 nm in diameter)**

- Deposition current= 6 nA=  $6.0 \times 10^{-9}$  C/s
- Area corresponding to a single TiO<sub>2</sub> NT (100 nm diameter, r=50 nm)=  $A = \pi r^2$
- Ion flux per unit time per area corresponding to a single TiO<sub>2</sub> NT (100 nm diameter) =  $\frac{6.0 \times 10^{-9} \text{ C/s}}{A} = 0.0764 \times 10^5 \text{ C/s.m}^2 = 0.00764 \text{ C/}\mu\text{s. m}^2$

Table1. List of voltages on the ion soft-landing instrument for depositing POM anions.

| Ion optics component | Voltages (V) |
|----------------------|--------------|
| Repel in             | 385          |
| Repel out            | 380          |
| HPF in               | 331          |
| HPF out              | 160          |
| LPF in               | 163          |
| LPF out              | 16           |
| HPF Drive            | 22.6         |
| LPF Drive            | 24.7         |
| HPF Freq             | 690000 Hz    |
| LPF Freq             | 912000 Hz    |
| Bent flatapole       | 32 V         |

HPF: High pressure funnel

LPF: Low pressure funnel
